# Supplementary material for: Denosumab's Therapeutic Effect for Future Osteosarcopenia Therapy : A Systematic Review and Meta-Analysis
Source: PubMed Central journal article supplement — Ann Geriatr Med Res. 2023 Jan 11;27(1):32–41. doi: 10.4235/agmr.22.0139 (PMC10073968; doi:10.4235/agmr.22.0139), 2023-01-11
Supplement: agmr-22-0139-suppl1.pdf [file agmr-22-0139-suppl1.pdf]

## SUPPLEMENTARY MATERIALS

**Table S1.** Summary of study appraisal based on JBI appraisal checklist

| Study                         | Design | Overall appraisal |   |   |   |   |    |   |   |   |    |    |    |    |          |          |
|-------------------------------|--------|-------------------|---|---|---|---|----|---|---|---|----|----|----|----|----------|----------|
|                               |        | 1                 | 2 | 3 | 4 | 5 | 6  | 7 | 8 | 9 | 10 | 11 | 12 | 13 |          |          |
| Bonnet et al. <sup>21)</sup>  | RCT    | U                 | Y | U | U | U | U  | Y | Y | Y | Y  | Y  | Y  | Y  | Y        | Included |
| Miedany et al. <sup>22)</sup> | RCT    | N                 | Y | Y | Y | Y | Y  | Y | Y | Y | Y  | Y  | Y  | Y  | Y        | Included |
| Rupp et al. <sup>23)</sup>    | Cohort | Y                 | Y | Y | U | U | NA | Y | Y | Y | NA | Y  | -  | -  | Included |          |
| Phu et al. <sup>24)</sup>     | Cohort | Y                 | Y | Y | U | U | NA | Y | Y | Y | Y  | Y  | -  | -  | Included |          |

Scored gained/maximum score, appropriate appraisal for either RCT, cohort (prospective or retrospective) or cross-sectional study was used (RCT 13 criteria, cohort 11 criteria).

JBI, Joanna Briggs Institute; RCT, randomized controlled trial; Y, yes; N, no; U, unclear; NA, not applicable.
