# Supplementary material for: Denosumab's Therapeutic Effect for Future Osteosarcopenia Therapy : A Systematic Review and Meta-Analysis
Source: PubMed Central journal article supplement — Ann Geriatr Med Res. 2023 Jan 11;27(1):32–41. doi: 10.4235/agmr.22.0139 (PMC10073968; doi:10.4235/agmr.22.0139), 2023-01-11
Supplement: agmr-22-0139-suppl3.pdf [file agmr-22-0139-suppl3.pdf]

**Table S3.** Summary of study appraisal based on JBI appraisal checklist for RCT: Miedany et al.<sup>22)</sup>

|                                                                                                                                                                                           | <b>Yes</b>               | <b>No</b>                | <b>Unclear</b>           | <b>NA</b>                |
|-------------------------------------------------------------------------------------------------------------------------------------------------------------------------------------------|--------------------------|--------------------------|--------------------------|--------------------------|
| 1. Was true randomization used for assignment of participants to treatment groups?                                                                                                        | <input type="checkbox"/> | <b>V</b>                 | <input type="checkbox"/> | <input type="checkbox"/> |
| 2. Was allocation to treatment groups concealed?                                                                                                                                          | <b>V</b>                 | <input type="checkbox"/> | <input type="checkbox"/> | <input type="checkbox"/> |
| 3. Were treatment groups similar at the baseline?                                                                                                                                         | <b>V</b>                 | <input type="checkbox"/> | <input type="checkbox"/> | <input type="checkbox"/> |
| 4. Were participants blind to treatment assignment?                                                                                                                                       | <b>V</b>                 | <input type="checkbox"/> | <input type="checkbox"/> | <input type="checkbox"/> |
| 5. Were those delivering treatment blind to treatment assignment?                                                                                                                         | <b>V</b>                 | <input type="checkbox"/> | <input type="checkbox"/> | <input type="checkbox"/> |
| 6. Were outcomes assessors blind to treatment assignment?                                                                                                                                 | <b>V</b>                 | <input type="checkbox"/> | <input type="checkbox"/> | <input type="checkbox"/> |
| 7. Were treatment groups treated identically other than the intervention of interest?                                                                                                     | <b>V</b>                 | <input type="checkbox"/> | <input type="checkbox"/> | <input type="checkbox"/> |
| 8. Was follow-up complete and if not, were differences between groups in terms of their follow-up adequately described and analyzed?                                                      | <b>V</b>                 | <input type="checkbox"/> | <input type="checkbox"/> | <input type="checkbox"/> |
| 9. Were participants analyzed in the groups to which they were randomized?                                                                                                                | <b>V</b>                 | <input type="checkbox"/> | <input type="checkbox"/> | <input type="checkbox"/> |
| 10. Were outcomes measured in the same way for treatment groups?                                                                                                                          | <b>V</b>                 | <input type="checkbox"/> | <input type="checkbox"/> | <input type="checkbox"/> |
| 11. Were outcomes measured in a reliable way?                                                                                                                                             | <b>V</b>                 | <input type="checkbox"/> | <input type="checkbox"/> | <input type="checkbox"/> |
| 12. Was appropriate statistical analysis used?                                                                                                                                            | <b>V</b>                 | <input type="checkbox"/> | <input type="checkbox"/> | <input type="checkbox"/> |
| 13. Was the trial design appropriate, and any deviations from the standard RCT design (individual randomization, parallel groups) accounted for in the conduct and analysis of the trial? | <b>V</b>                 | <input type="checkbox"/> | <input type="checkbox"/> | <input type="checkbox"/> |

Overall appraisal: Include (V), Exclude () or Seek further info ()
