# Supplementary material for: Denosumab's Therapeutic Effect for Future Osteosarcopenia Therapy : A Systematic Review and Meta-Analysis
Source: PubMed Central journal article supplement — Ann Geriatr Med Res. 2023 Jan 11;27(1):32–41. doi: 10.4235/agmr.22.0139 (PMC10073968; doi:10.4235/agmr.22.0139), 2023-01-11
Supplement: agmr-22-0139-suppl4.pdf [file agmr-22-0139-suppl4.pdf]

**Table S4.** Summary of study appraisal based on JBI appraisal checklist for cohort: Phu et al.<sup>23)</sup>

|                                                                                                               | <b>Yes</b>               | <b>No</b>                | <b>Unclear</b>           | <b>NA</b>                |
|---------------------------------------------------------------------------------------------------------------|--------------------------|--------------------------|--------------------------|--------------------------|
| 1. Were the two groups similar and recruited from the same population?                                        | V                        | <input type="checkbox"/> | <input type="checkbox"/> | <input type="checkbox"/> |
| 2. Were the exposures measured similarly to assign people to both exposed and unexposed groups?               | V                        | <input type="checkbox"/> | <input type="checkbox"/> | <input type="checkbox"/> |
| 3. Was the exposure measured in a valid and reliable way?                                                     | V                        | <input type="checkbox"/> | <input type="checkbox"/> | <input type="checkbox"/> |
| 4. Were confounding factors identified?                                                                       | <input type="checkbox"/> | <input type="checkbox"/> | V                        | <input type="checkbox"/> |
| 5. Were strategies to deal with confounding factors stated?                                                   | <input type="checkbox"/> | <input type="checkbox"/> | V                        | <input type="checkbox"/> |
| 6. Were the groups/participants free of the outcome at the start of the study (or at the moment of exposure)? | <input type="checkbox"/> | <input type="checkbox"/> | <input type="checkbox"/> | V                        |
| 7. Were the outcomes measured in a valid and reliable way?                                                    | V                        | <input type="checkbox"/> | <input type="checkbox"/> | <input type="checkbox"/> |
| 8. Was the follow-up time reported and sufficient to be long enough for outcomes to occur?                    | V                        | <input type="checkbox"/> | <input type="checkbox"/> | <input type="checkbox"/> |
| 9. Was follow-up complete, and if not, were the reasons to loss to follow-up described and explored?          | V                        | <input type="checkbox"/> | <input type="checkbox"/> | <input type="checkbox"/> |
| 10. Were strategies to address incomplete follow-up utilized?                                                 | <input type="checkbox"/> | <input type="checkbox"/> | <input type="checkbox"/> | V                        |
| 11. Was appropriate statistical analysis used?                                                                | V                        | <input type="checkbox"/> | <input type="checkbox"/> | <input type="checkbox"/> |

Overall appraisal: Include (V), Exclude () or Seek further info ().
